# Supplementary material
Source: PubMed Central journal article supplement (PMC5150378)
Supplement: pnas.1617644113.sapp.pdf [file pnas.1617644113.sapp.pdf]

Supplemental Information (SI) Appendix for *Reconstitution of a Mycobacterium tuberculosis Proteostasis Network Highlights Essential Cofactor Interactions with Chaperone DnaK*

Tania Lupoli,<sup>1</sup> Allison Fay,<sup>2</sup> Carolina Adura,<sup>3</sup> Michael S. Glickman<sup>2,4</sup> & Carl Nathan<sup>1</sup>

<sup>1</sup>Department of Microbiology and Immunology, Weill Cornell Medicine, New York, NY-10021.

<sup>2</sup>Immunology Program, Memorial Sloan-Kettering Cancer Center, New York, NY-10065.

<sup>3</sup>High-Throughput Screening and Spectroscopy Resource Center, The Rockefeller University, New York, NY-10065.

<sup>4</sup>Division of Infectious Diseases, Memorial Sloan-Kettering Cancer Center, New York, NY-10065

## Supplemental Method

### MIC determination

Overnight log phase cultures of each strain, *mc*<sup>2</sup>155, MGM6069, MGM6160, MGM6161, and MGM6272, were diluted back to an OD<sub>600</sub> 0.005 in LBsmeg without tween-80. A 2-fold dilution series for each antibiotic was generated in a 96-well plate containing 2x the final antibiotic concentration in LBsmeg without tween-80. 100  $\mu$ l of diluted culture was added to each well to generate a final dilution series from 20  $\mu$ g/ml to 0.3125  $\mu$ g/ml for both kanamycin and isoniazid (INH). Each strain was setup in triplicate and plates were incubated at 37°C. Pellicle formation was assessed at 72 hours.

### Figure Legends

**Figure S1.** SDS-PAGE analysis of recombinant Mtb protein chaperones and accessory proteins. (a) Mtb DnaK, DnaJ1, DnaJ2, GrpE, and ClpB were purified from *E. coli* as N-terminal His-SUMO fusions prior to cleavage of the solubility tag. (b) Mtb Hsp20 was purified from *E. coli* with an N-terminal His-tag. For all figures, K = DnaK, J1 = DnaJ1, J2 = DnaJ2, E = GrpE, B = ClpB.

**Figure S2.** Standard curve of extracted ion counts (EIC) for indicated concentrations of (a) ATP and (b) ADP in quenched reaction buffers (see Methods) analyzed by Agilent Rapid Fire mass spectrometry. Error bars represent SD for n = 3.

**Figure S3.** Mass-spectrometry analysis of the ATPase activity of DnaK in the presence of varying [cofactor] and [substrate] shows that addition DnaJ2 and GrpE result in optimal ATP hydrolysis. (a) Example of time courses used to calculate initial rates of DnaK plus GrpE with increasing [DnaJ2] (**Figure 2c**), which is shown as relative to [DnaK]. (b) Analysis of DnaK with sub-stoichiometric DnaJ1 with varying [DnaJ2] shows that DnaJ1 does not enhance stimulation of DnaK with increasing [DnaJ2]. (c) Analysis of DnaK alone and in the presence of sub-stoichiometric DnaJ2 and GrpE with varying [DnaJ1] shows that DnaJ1 stimulates DnaK's ATPase activity at equimolar concentration in the presence or absence of other cofactors. (d) Analysis of DnaK alone and in the presence of sub-stoichiometric DnaJ1 and DnaJ2 with varying [GrpE] shows that optimal ATPase activity occurs with DnaJ2 and sub-stoichiometric GrpE. This observation agrees with the data shown in Figure 2c. A control was done with DnaJ2 and GrpE

alone (pink) to verify that the two cofactors do not possess background ATPase activity. (e) Kinetic parameters of DnaK with and without DnaJ2+GrpE. Error bars indicate SEM for n = 2.

**Figure S4.** Partial alignment of N-terminal protein sequences of J-proteins from Mtb (MYCTU), *M. smegmatis* (Msm) (MYCS2), *E. coli*, *S. cerevisiae* (yeast), and humans with conserved HPD motif in red. Alignment performed by Clustal Omega, where asterisks indicate identical amino acids and dots indicate similar amino acids.

**Figure S5.** Mass-spectrometry analysis of DnaK ATPase activity over time with wild-type J-proteins compared to point mutants in the HPD motif. (a) Initial rate analysis with sub-stoichiometric DnaJ2 wild-type, H32Q or D34E mutants plus GrpE shows that only wild-type DnaJ2 stimulates DnaK's activity. (b) Reaction analysis as described in part a except with wild-type DnaJ1 or H38Q plus GrpE illustrates that the DnaJ1 mutant is not capable of stimulating the ATPase activity of DnaK. Error bars indicate SEM for n = 2.

**Figure S6.** DnaJ2 and HPD point mutant H32Q co-elute with His-DnaK bound to Ni-NTA beads. (a) SDS-PAGE analysis of purified protein pull-down as described in Figure 3a except His-DnaK was not added to input. Only a faint band representing DnaJ2 can be seen in the elution (E) lane, which is enhanced in the presence of His-K. (b) Protein band quantification of replicate Figure 3a experiments. SDS-PAGE analysis using the same protocol shows that His-K co-elutes with (c) DnaJ2 and (d) DnaJ2(H32Q) in the absence of other cofactors or ClpB. (e) SDS-PAGE analysis of purified protein pull-down as described in Figure 3a except denatured luciferase plus Hsp20 (25 and 100 nM, respectively) in Buffer H was added to proteins during the incubation step. (f) Protein quantification of replicate experiments from part e. For each gel, I represents input and W represents wash steps. Band quantification performed using Image J, error bars represent SD for n = 2. Total area is sum of area under indicated protein band curves in the elution lane.

**Figure S7.** Microscale thermophoresis (MST) using fluorescent label (FL) on different binding partners can be used to analyze binding interactions between DnaK and DnaJ2. (a) Initial fluorescence measurements of MST samples containing DnaJ2-FL (21 nM) with varying concentration of wt or mutant DnaK (defective in hydrolyzing ATP) in the

presence of 2 mM ATP/MgCl<sub>2</sub>. In order to perform MST analysis, the initial fluorescence must be +/-10% of the average for all samples, as shown by the dotted lines for DnaK (T175S). Wild-type DnaK samples do not fall within the +/-10% cutoff, perhaps because of conformational changes in DnaJ2-FL as it binds/releases DnaK during ATP hydrolysis. (b) MST analysis of wild-type DnaK-FL (30 nM) with a range of wild-type DnaJ2 in the absence of nucleotide. The initial fluorescence of each sample was within the +/-10% range. (c) ATPase activity analysis of indicated concentrations of DnaK with and without FL in the presence of cofactors shows that labeling does not affect the activity of DnaK. (d) ATPase activity of DnaK stimulated by indicated concentration of DnaJ2 with and without FL shows that labeling does slightly affect the amount of activation, but DnaJ2-FL is still active. For a-b, error bars indicate SD for n = 2; for c-d, error bars indicate SEM for n = 2.

**Figure S8.** Recombinant Mtb ClpB forms oligomers and exhibits ATPase activity *in vitro*. (a) Gel filtration UV trace of Mtb ClpB in the presence and absence of ATP using a published protocol to evaluate its oligomeric state. ClpB (4 mg) was injected on a superdex 200 10/300 GL column in 50 mM Tris (pH 7.5), 0.2 M KCl, 20 mM MgCl<sub>2</sub>, 1 mM EDTA, 1 mM DTT, 10% (vol/vol) glycerol +/- 2 mM ATP. (1) HMW protein standards (GE Healthcare) were injected on the same column using the same buffers. The elution volume of the standards was not affected by the addition of ATP; however, ClpB eluted at a lower volume in ATP signifying a shift to a higher oligomeric state as indicated in the table (right). (b) Gel filtration UV trace of a higher concentration of Mtb ClpB (2x of that shown in part a) in 20 mM tris (pH 8.0), 150 mM NaCl, 10% (vol/vol) glycerol for use in enzymatic assays. Fractions corresponding to the major peak between 10-12 mL elution volume were collected. For parts a and b, the oligomeric state of ClpB was estimated based on the elution volume of the standards in the appropriate buffer using the manufacturer's instructions, see *Methods* section (GE Healthcare). (c) ATPase activity of ClpB purified from part b at indicated concentrations at t = 20 min (error bars indicate SD for n = 2).

**Figure S9.** Mtb Hsp20 (Rv0251c) helps re-solubilize heat-aggregated luciferase *in vitro*. (a) Representative western blot (anti-luciferase) of 25 nM luciferase +/- Hsp20 (100 nM) that is untreated (native) or heat-treated at 42°C for 10 min (denatured) prior to ultracentrifugation to separate soluble (S/N) and pellet (P) fractions. (b) Analysis of



samples from part a. Luciferase activity of samples measured before ultracentrifugation, which illustrates that denatured luciferase is heat killed with or without Hsp20 (left). Quantification of western blots shows the percent of luciferase in each fraction for the indicated samples, showing that there is slightly more soluble heat-killed luciferase in samples containing Hsp20 (compare denatured sample +/- Hsp20) (right). (c) Titration of Hsp20 to luciferase (25 nM) prior to heat-treatment shows that the efficiency of the refolding reaction by DnaK + ClpB and cofactors improves with increasing [Hsp20] (reaction performed as described for Figure 4, read at  $t = 60$  min). Four-fold Hsp20 was chosen for experiments because it allows us to distinguish between chaperone reactions +/- ClpB. For part b, error bars indicate SD for  $n = 2$ . For part c, error bars indicate SEM for  $n = 2$ . Western blots were quantified using Image J. Note that the gel shift in the aggregated luciferase versus native fractions is likely due to the tendency of protein aggregates or unfolded structures to migrate less efficiently by gel electrophoresis (see ref (2, 3)) and the presence of another detergent in the aggregate re-solubilization buffer.

**Figure S10.** Normalization of heat-treated luciferase refolding data demonstrates consistent results when different stocks of luciferase are used. Over the course of performing luciferase refolding experiments, there were differences in the native luciferase activity depending on the stock of enzyme used, which resulted in different “percent luciferase activity” values for similar reaction mixtures. This graph shows that when the data of independent luciferase refolding experiments is first normalized and then combined, there is low error. We present the data in the remainder of the figures as “percent native luciferase” because these experiments were done using native luciferase with similar activities. Shown here, after heat-treatment of 25 nM luciferase with 100 nM Hsp20, reactions were conducted at 25 °C containing 4  $\mu$ M DnaK, 2  $\mu$ M ClpB, 2  $\mu$ M GrpE and 2  $\mu$ M each J-protein, and were read at  $t = 30$  min. Error bars indicate SEM for  $n = 4$ .

**Figure S11.** Refolding of heat-treated luciferase by DnaK, ClpB and GrpE with varying [J-protein] using wild-type and HPD motif mutants demonstrates inhibition of the reaction with J-protein mutants. (a) Percent of active luciferase resulting from reactions containing increasing amounts of one J-protein shows that increased concentration of either J1 or J2 does not refold as efficiently as both J1 and J2. (b) Addition of DnaJ2(H32Q) to refolding reactions containing only one J-protein (DnaJ2) shows that

the point mutant inhibits the reaction in a concentration dependent manner. The point mutant alone demonstrates no cofactor activity, even at high concentration (light blue bar). (c) Addition of increasing wild-type DnaJ1 to refolding reactions containing both DnaJ1 and J2 does not affect refolding, while increasing [DnaJ1(H38Q)] inhibits the reaction in a concentration-dependent manner. After heat-treatment of 25 nM luciferase with 100 nM Hsp20, all reactions were conducted at 25 °C containing 4 μM DnaK, 2 μM ClpB, 2 μM GrpE and the indicated amount of J-protein, and were read at t = 30 min. Error bars indicate SEM for n = 2. D.L. is denatured luciferase starting material.

**Figure S12.** DnaJ2-mediated stimulation of DnaK's ATPase activity is stronger than DnaJ1-mediated stimulation in the presence and absence of aggregated substrate. ATPase activity was measured as described in the Methods section, except indicated proteins (4 μM DnaK and 400 nM each cofactor) were incubated with denatured luciferase plus Hsp20 (25 and 100 nM, respectively) in Buffer H (D.L.) or just Buffer H alone, for 10 min at 37 °C prior to initiation with 100 μM ATP. Note that the baseline activity of DnaK is slightly higher than that seen in Figure 2a, likely due to the presence of Buffer H.

**Figure S13.** DnaJ2(H32Q) partially inhibits activation of DnaK's ATPase activity by sub-stoichiometric DnaJ2 and GrpE at concentrations similar to those used in Figure 4e. DnaK (4 μM) was incubated with DnaJ2 (1 μM) and GrpE (400 nM) with indicated concentrations of additional wild-type or mutant DnaJ2 prior to addition of 100 μM ATP at 37 °C. The red dashed line indicates the initial rate with only DnaK and GrpE, representing full inhibition of the DnaJ2-induced activation. The black dashed line indicates the initial rate with 1 μM DnaJ2 added. Error bars indicate SEM for n=2.

**Figure S14.** Southern blot confirmation of *M. smegmatis* (Msm) *dnaJ1* and *dnaJ2* allelic replacements. Expected band sizes indicated at left of blot. (a) Confirmation of *dnaJ1* deletion using AhdI/Clal double digest of genomic DNA and *dnaJ1* 5' flank as probe. Ladder (1500bp), wildtype (3436bp), MGM6272 ( $\Delta dnaJ1$  attB:Pmop-*dnaJ1* kan) and MGM6239 ( $\Delta dnaJ1$   $\Delta dnaJ2$ :*hyg* attB:Pmop-*dnaJ1* strep) (2263bp). (b) Confirmation of *dnaJ2* deletion using MluI/MscI double digest of genomic DNA and *dnaJ2* 5' flank as

probe. Ladder (1500bp), wildtype (2198bp), MGM6070 ( $\Delta dnaJ2::hyg$ ) and MGM6239 ( $\Delta dnaJ1 \Delta dnaJ2::hyg attB::Pmop-dnaJ1 strep$ ), (2726bp).

**Figure S15.** Msm single *dnaJ* deletion mutants are *not* more sensitive to heat or aggregate-forming antibiotics than wild-type. (a) Heat sensitivity of *mc*<sup>2</sup>155 (wild-type), MGM6069 ( $\Delta dnaJ1 attB::strep$ ), and MGM6070 ( $\Delta dnaJ2::loxP-hyg$ ). Cultures at OD<sub>600</sub> 0.4 were incubated at 53°C. Aliquots were taken at indicated time points and serial dilutions were plated on LBsmeg. (b) MIC determination by pellicle formation in the presence of isoniazid (INH) and kanamycin of *mc*<sup>2</sup>155 (wild-type), MGM6069 ( $\Delta dnaJ1 attB::strep$ ), and MGM6160 ( $\Delta dnaJ2::loxP-hyg attB::strep$ ), and complemented strains MGM6272 ( $\Delta dnaJ1 attB::Pmop-dnaJ1 strep$ ) and MGM6161 ( $\Delta dnaJ2::loxP-hyg attB::Pmop-dnaJ2 strep$ ). See description of MIC method above.

**Figure S16.** Msm (Ms) *dnaJ* is essential for growth. Strains carrying deletions in chromosomal *dnaJ1* and *dnaJ2* and a copy of *dnaJ1* at the *attB* phage integration site were subjected to marker exchange with *attB* integrating vectors. (A)  $\Delta dnaJ1 \Delta dnaJ2::hyg attB::Pmop-dnaJ1 kan$  (MGM6240) transformed with pDB60 (*strep*<sup>R</sup>, empty vector) or pAJF295 (Ms *dnaJ1*), pAJF296 (Ms *dnaJ2*), pAJF710 (Mtb *dnaJ2*), pAJF700 (Ms *dnaJ2 H32Q*), pAJF705 (Mtb *dnaJ1 H38Q*), or pAJF707 (Mtb *dnaJ2 H32Q*). Transformations were plated on streptomycin selective media incubated at 37°C. (B)  $\Delta dnaJ1 \Delta dnaJ2::hyg attB::Pmop-dnaJ1 kan$  (MGM6240) transformed with pDB60 (empty vector), pAJF710 (Mtb *dnaJ2*), or pAJF707 (Mtb *dnaJ2 H32Q*). Transformations were plated on streptomycin selective media incubated at 30°C.

**Figure S17.** Western blot of DnaJ proteins in Msm. (a) Lysates from DnaJ1 mutants in Msm, MGM6272 ( $\Delta dnaJ1 attB::Pmop-dnaJ1 strep$ ), MGM6069 ( $\Delta dnaJ1 attB::strep$ ), MGM6284, ( $\Delta dnaJ1 attB::Pmop-MsdnaJ1(H38Q) strep$ ), and MGM6283 ( $\Delta dnaJ1 attB::Pmop-Mtb dnaJ1(H38Q) strep$ ) probed for DnaJ1 (top) and RNAP Beta (bottom). (b) Lysates from DnaJ2 mutants in Msm, MGM6161 ( $\Delta dnaJ2::hyg attB::Pmop-MsdnaJ2 strep$ ), MGM6160 ( $\Delta dnaJ2::hyg attB::strep$ ), MGM6285 ( $\Delta dnaJ2::hyg attB::Pmop-MsdnaJ2(H32Q) strep$ ), and MGM6286 ( $\Delta dnaJ2::hyg attB::Pmop-MtbdnaJ2(H32Q) strep$ ) probed for DnaJ2 (top) and RNAP Beta (bottom).

**Figure S1.**

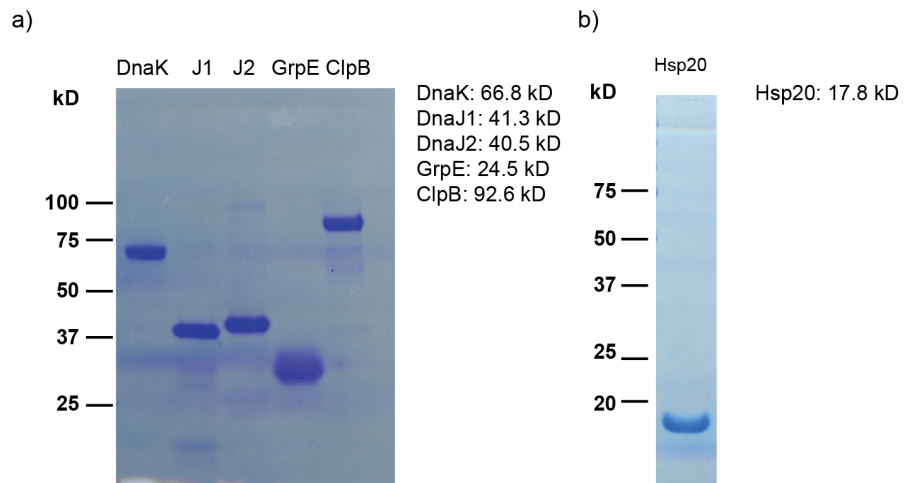

**Figure S2.**

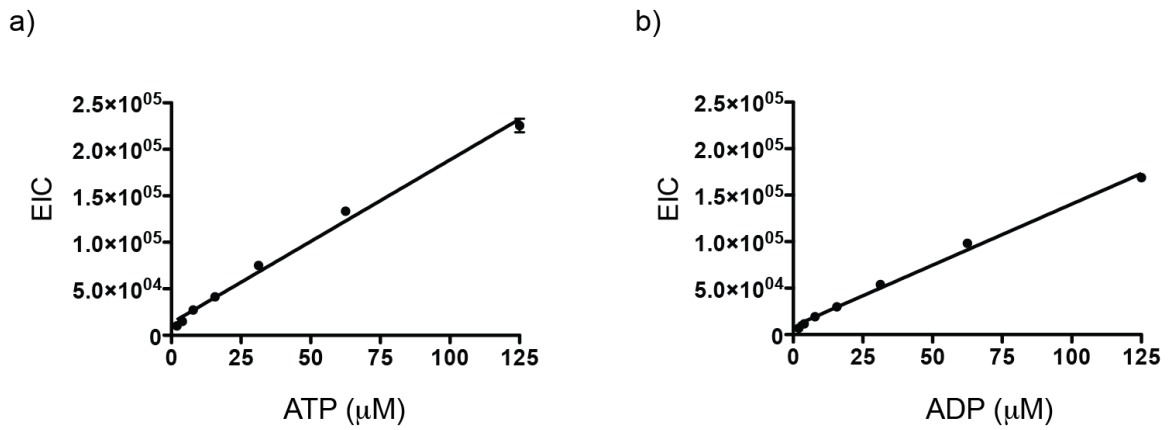

Figure S3.

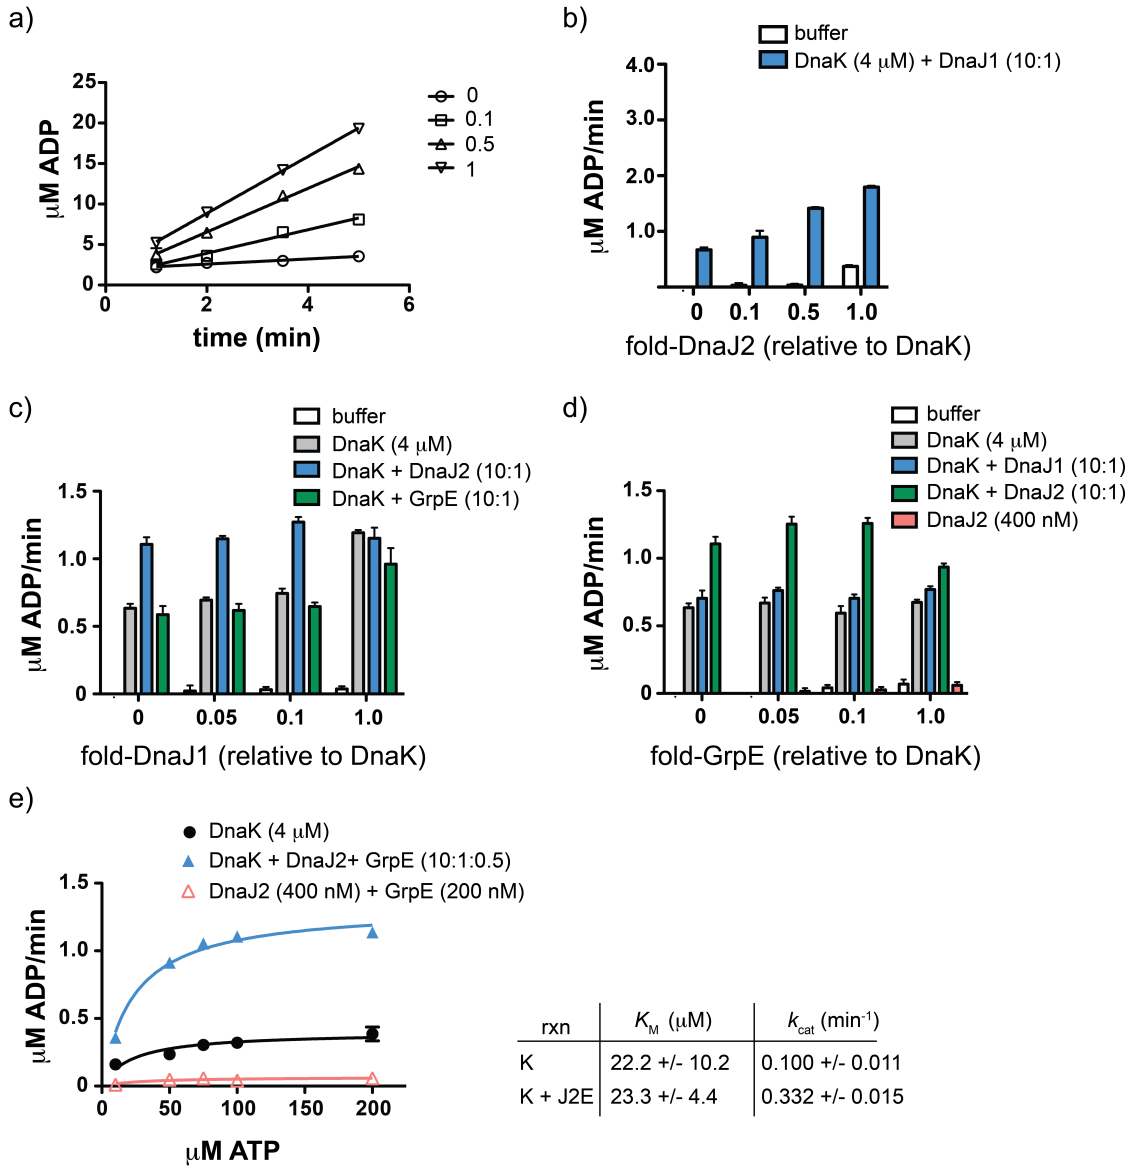

Figure S4.

```

sp | P9WNV7 | DNAJ2_MYCTU | -----MARDYYGLLGVSKNASDADIKRAYRKLARELHPDVNP-DEEAQAKFKEISVAYE
tr | A0R0T8 | DNAJ2_MYCS2 | -----MARDYYGLLGVSKGASDSEIKRAYRRLARELHPDVNP-DEEAQHRFTEIQQAYE
sp | P08622 | DNAJ_ECOLI | -----MAQDYDYEILGVSKTAEEREIRKAYKRLAMKYHPDRNQGDKEAEAKFKEIKEAYE
sp | P9WNV9 | DNAJ1_MYCTU | MAQREWVEKDFYQELGVSSDASPEEIKRAYRKLARDLHPDANPGNPAAGERFKAVSEAHN
tr | A0QQD0 | DNAJ1_MYCS2 | MAQREWVEKDFYKELGVSSDASADEIKRAYRKLAAELHPDRNS-DPGAAERFKAVSEANS
sp | P25685 | DNJB1_HUMAN | -----MGKDYDYLGLARGASDEEIKRAYRRQALRYHPDKNK-EPGAEKFKIEAEAYD
sp | P25491 | YDJ1_YEAST | -----MVKETKFDYDILGVPVTATDVEIKKAYRKALKYHPDKNP-SEEAEEKFKEASAAAYE
sp | O60884 | DNJA2_HUMAN | ---MANVADTKLYDILGVPPGASENELKKAYRKLAKKEYHPDKNP-N--AGDKFKEISFAYE

```

. \* \*\*: \* ::\*: \* \*\*\* \* . \* :. \* .

**Figure S5.**

a)

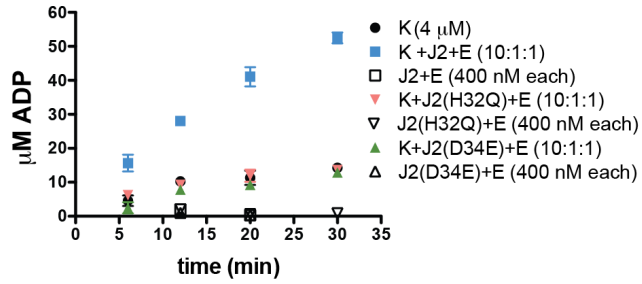

b)

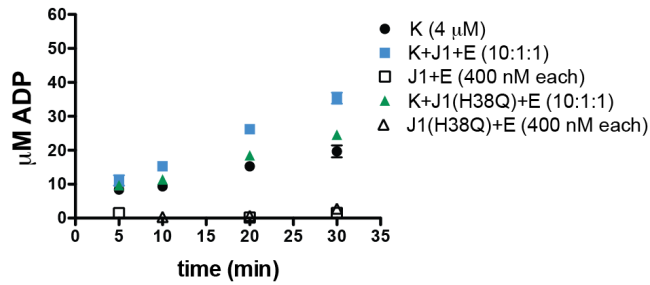

**Figure S6:**

a)

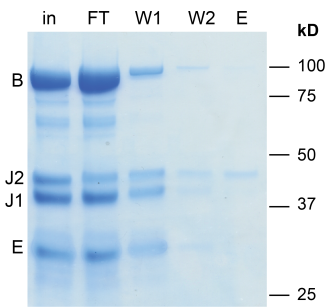

b)

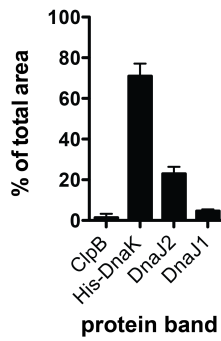

c)

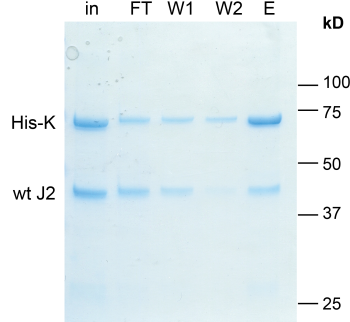

d)

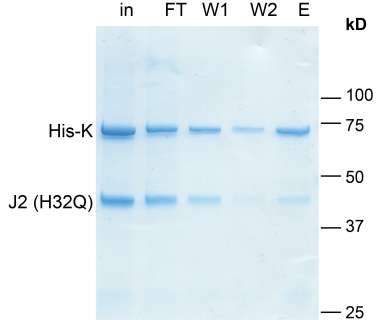

e)

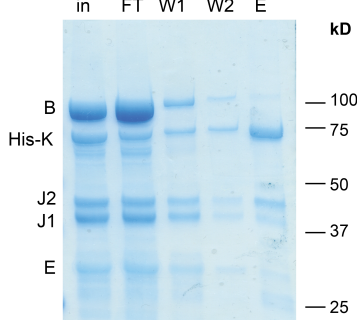

f)

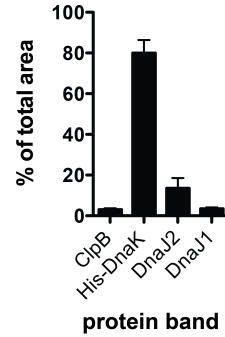

**Figure S7.**

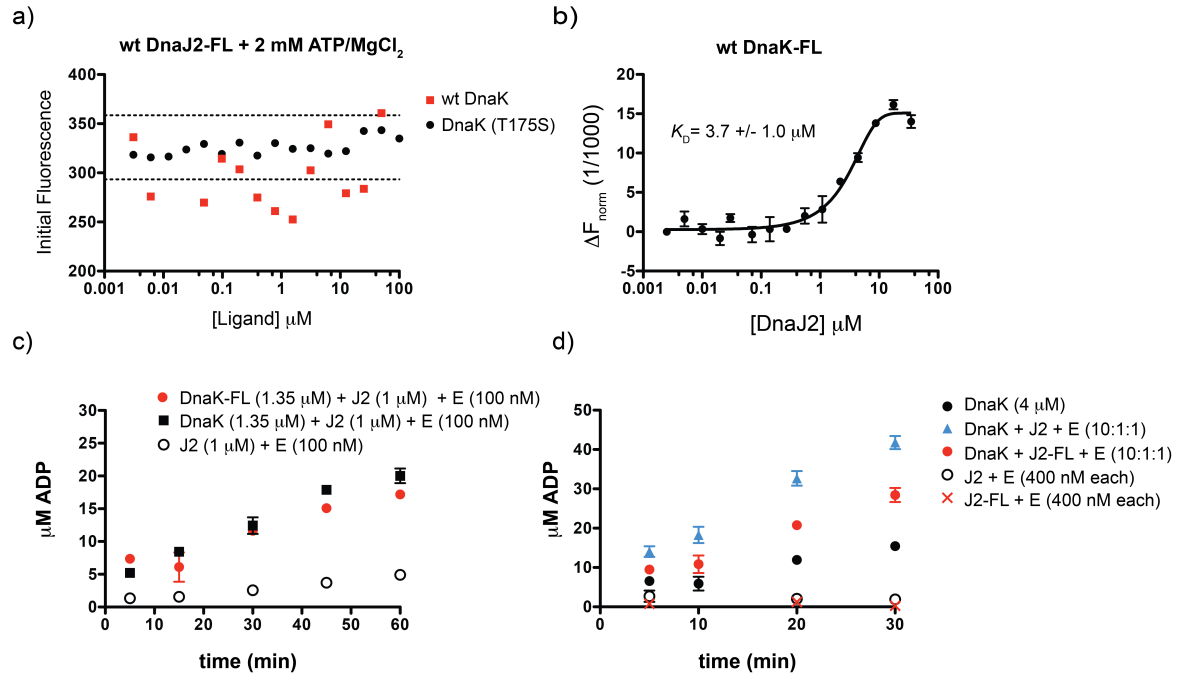

**Figure S8.**

a)

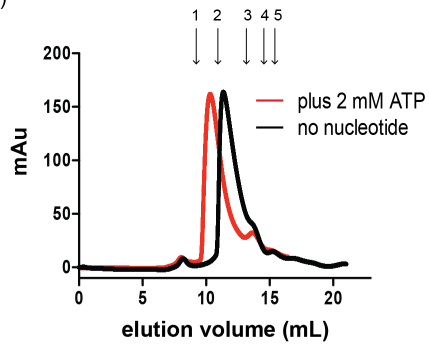

| stand. | MW (kD) | elution vol (mL) |      |
|--------|---------|------------------|------|
|        |         | +ATP             | -ATP |
| 1      | 669     | 9.4              | 9.4  |
| 2      | 440     | 11.0             | 11.1 |
| 3      | 158     | 13.2             | 13.2 |
| 4      | 75      | 14.5             | 14.5 |
| 5      | 44      | 15.4             | 15.5 |

| sample     | vol (mL) | pred. MW (kD) | pred. ClpB units |
|------------|----------|---------------|------------------|
| ClpB + ATP | 10.3     | 521.1         | 5.6              |
| ClpB - ATP | 11.3     | 332.4         | 3.6              |

b)

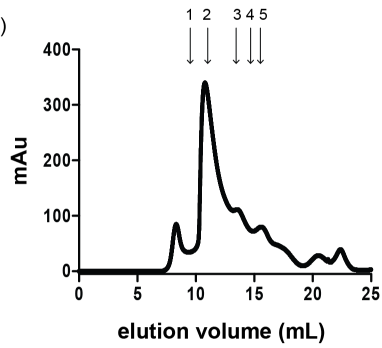

| stand. | MW (kD) | elution vol (mL) |
|--------|---------|------------------|
| 1      | 669     | 9.7              |
| 2      | 440     | 11.0             |
| 3      | 158     | 13.5             |
| 4      | 75      | 14.7             |
| 5      | 44      | 15.5             |

| sample      | vol (mL) | pred. MW (kD) | pred. ClpB units |
|-------------|----------|---------------|------------------|
| ClpB (8 mg) | 10.8     | 466.7         | 5.0              |

c)

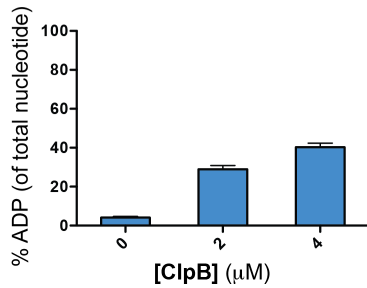



**Figure S9.**

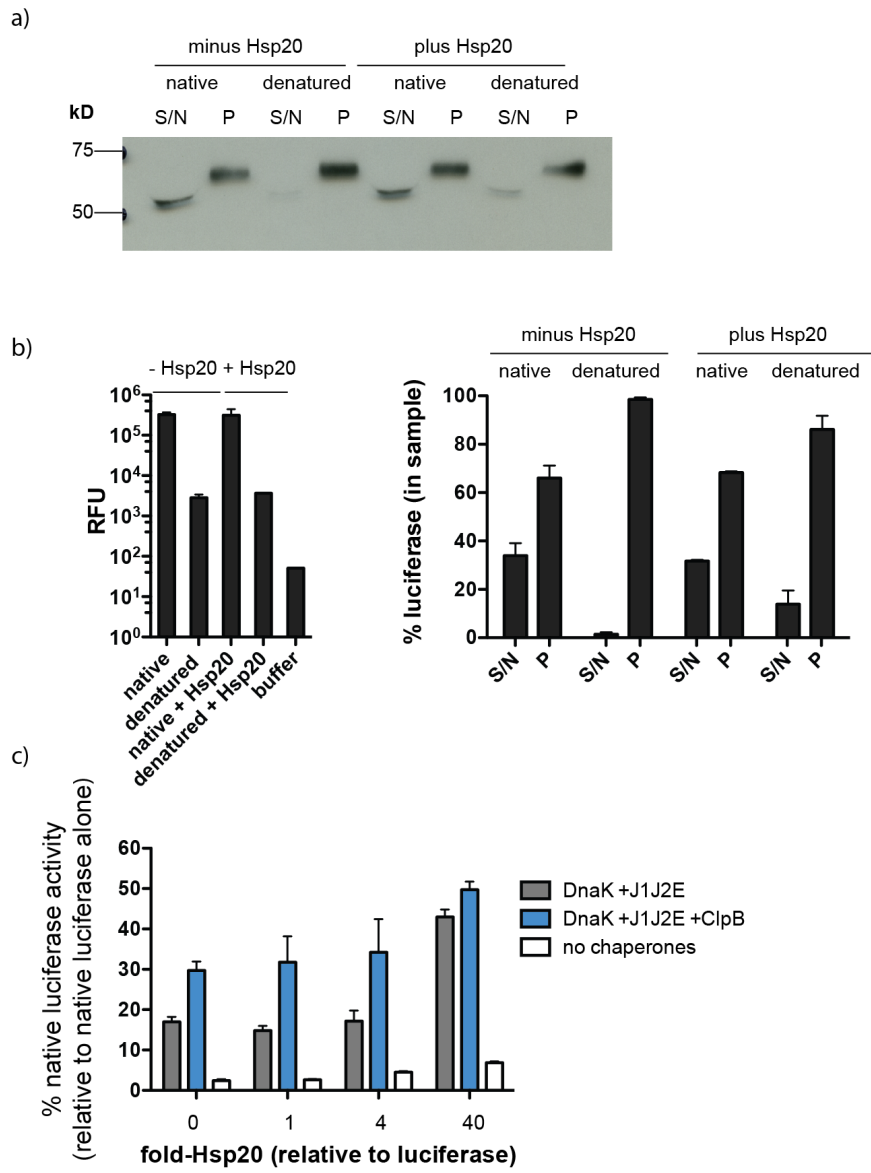

**Figure S10.**

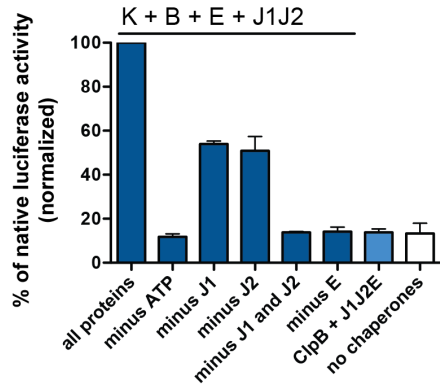

**Figure S11.**

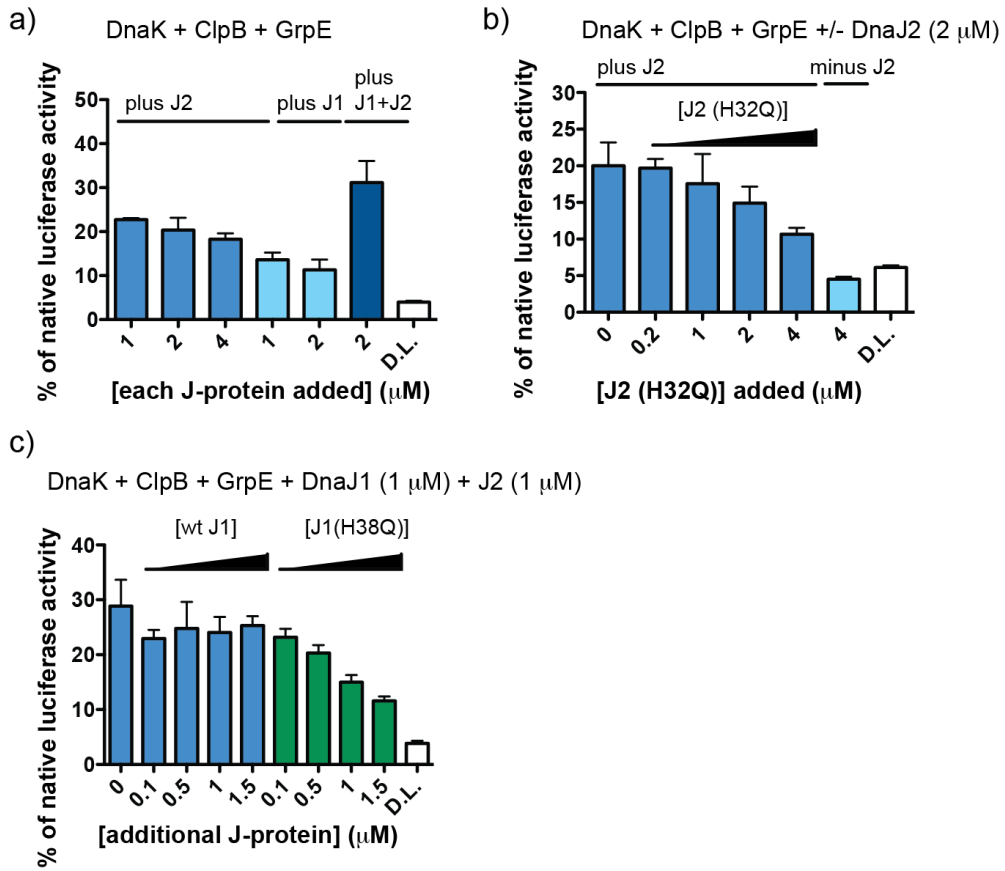

Figure S12.

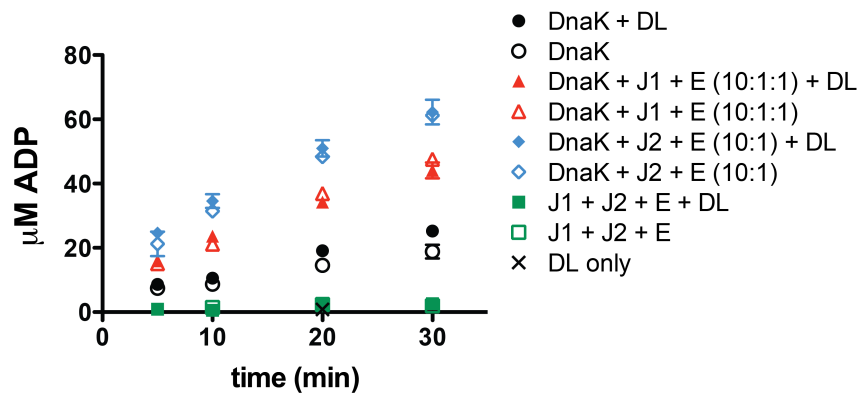

Figure S13.

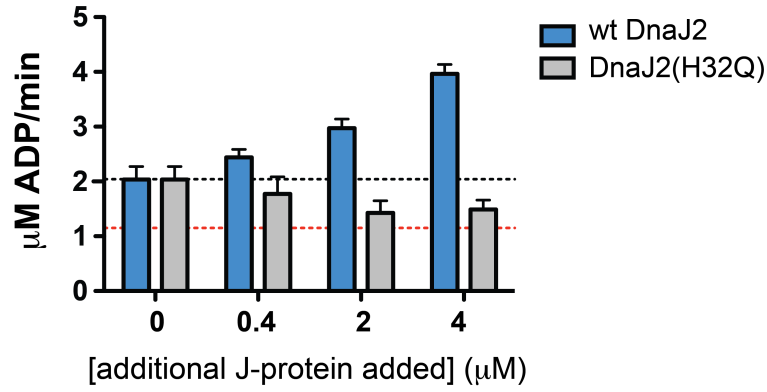

Figure S14.

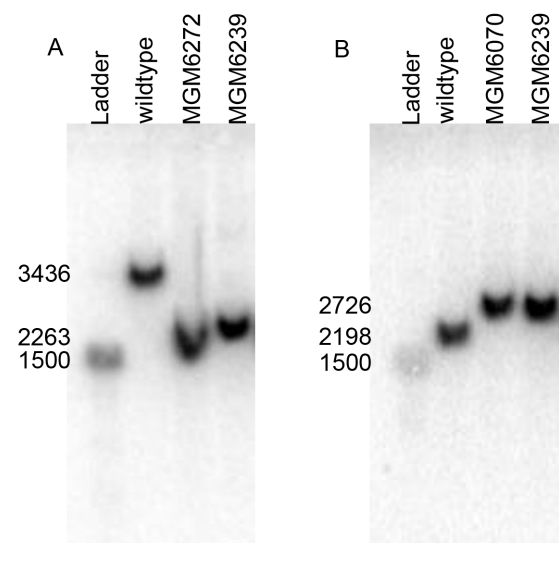

**Figure S15.**

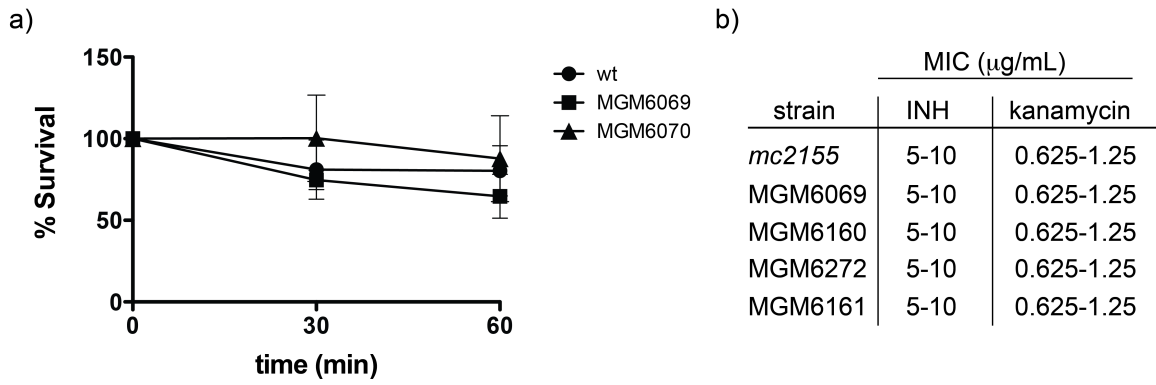

**Figure S16.**

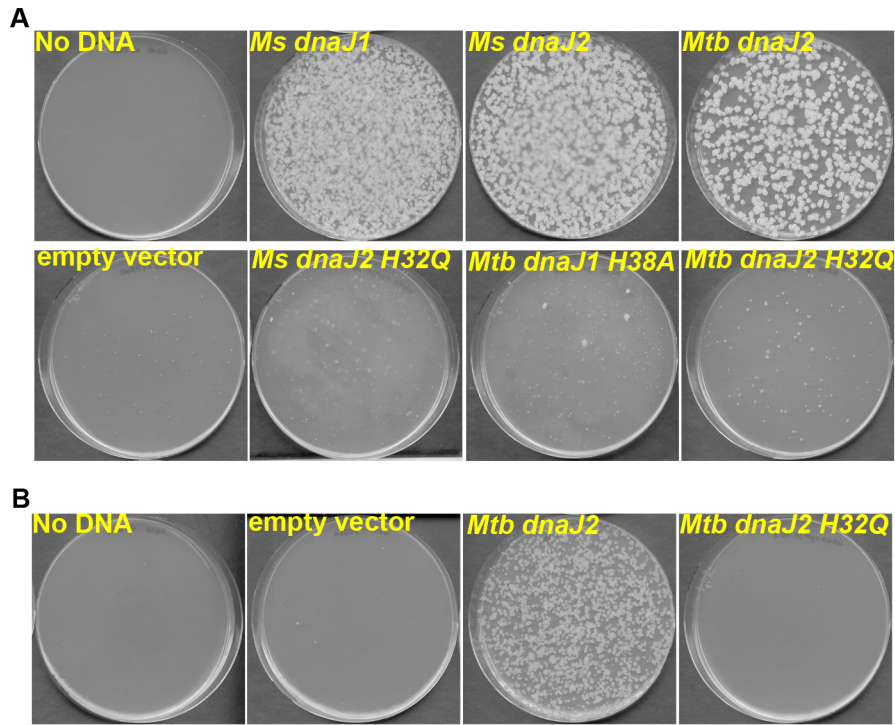

Figure S17.

A

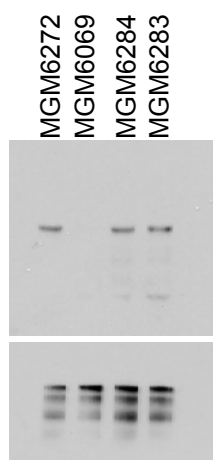

B

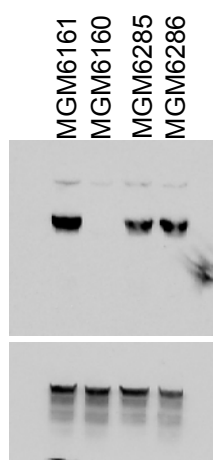

**Table S1. Strains used in this study.**

| <b>Strain Name</b>  | <b>Genotype</b>                                                            | <b>Details of Construction</b>                                                             |
|---------------------|----------------------------------------------------------------------------|--------------------------------------------------------------------------------------------|
| Rosetta2            | <i>E. coli</i> BL21 derivative for rare codon usage                        | Novagen                                                                                    |
| Rosetta2(DE3) pLysS | Rosetta2 expressing T7 lysozyme                                            | Novagen                                                                                    |
| EcTL02              | His6-SUMO-Mtb clpB                                                         | Rosetta2 transformed with pEcTL02                                                          |
| EcTL03              | His6-SUMO-Mtb dnaJ1                                                        | Rosetta2 transformed with pEcTL03                                                          |
| EcTL04              | His6-SUMO-Mtb dnaJ2                                                        | Rosetta2 transformed with pEcTL04                                                          |
| EcTL05              | His6-SUMO-Mtb grpE                                                         | Rosetta2 transformed with pEcTL05                                                          |
| EcTL06              | His6-SUMO-Mtb dnaK                                                         | Rosetta2 transformed with pEcTL06                                                          |
| EcTL07              | His6-Mtb dnaK                                                              | Rosetta2 transformed with pEcTL07                                                          |
| EcTL08              | His6-Mtb-Hsp20                                                             | Rosetta2 transformed with pEcTL08                                                          |
| EcTL09              | His6-SUMO-Mtb dnaK(T175S)                                                  | Rosetta2 transformed with pEcTL09                                                          |
| EcTL10              | His6-SUMO-Mtb dnaJ1(H38Q)                                                  | Rosetta2 transformed with pEcTL10                                                          |
| EcTL11              | His6-SUMO-Mtb dnaJ1(D40E)                                                  | Rosetta2 transformed with pEcTL11                                                          |
| EcTL12              | His6-SUMO-Mtb dnaJ2(H32Q)                                                  | Rosetta2 transformed with pEcTL12                                                          |
| EcTL13              | His6-SUMO-Mtb dnaJ2(D34E)                                                  | Rosetta2 transformed with pEcTL13                                                          |
| EcTL14              | His6-Ulp1 (residues 403-621)                                               | Rosetta2(DE3)pLysS transformed with pHYRS52                                                |
| <i>mc2155</i>       | wildtype <i>M. smegmatis</i>                                               | <b>ref. (4)</b>                                                                            |
| MGM6069             | $\Delta$ <i>dnaJ1 attB::strep</i>                                          | <i>dnaJ1</i> knockout made with pAJF258 containing pDB60 in <i>mc2155</i>                  |
| MGM6070             | $\Delta$ <i>dnaJ2::loxP-hyg</i>                                            | <i>dnaJ2</i> knockout made with temperature sensitive phage using pAJF306 in <i>mc2155</i> |
| MGM6160             | $\Delta$ <i>dnaJ2::loxP-hyg attB::strep</i>                                | MGM6070 transformed with pDB60                                                             |
| MGM6161             | $\Delta$ <i>dnaJ2::loxP-hyg attB::Pmop-dnaJ2 strep</i>                     | MGM6070 transformed with pAJF296                                                           |
| MGM6239             | $\Delta$ <i>dnaJ1 \Delta</i> <i>dnaJ2::loxP-hyg attB::Pmop-dnaJ1 strep</i> | MGM6240 transformed with pAJF295                                                           |
| MGM6240             | $\Delta$ <i>dnaJ1 \Delta</i> <i>dnaJ2::loxP-hyg attB::Pmop-dnaJ1 kan</i>   | MGM6241 with <i>dnaJ2</i> knockout made with temperature sensitive phage using pAJF306     |
| MGM6241             | $\Delta$ <i>dnaJ1 attB::Pmop-dnaJ1 kan</i>                                 | MGM6069 transformed with pAJF260                                                           |
| MGM6272             | $\Delta$ <i>dnaJ1 attB::Pmop-dnaJ1 strep</i>                               | MGM6241 transformed with pAJF295                                                           |
| MGM6282             | $\Delta$ <i>dnaJ1 \Delta</i> <i>dnaJ2::loxP-hyg attB::zeo pAJF329</i>      | MGM6239 transformed with pDB19 and pAJF329                                                 |
| MGM6283             | $\Delta$ <i>dnaJ1 attB::Pmop-Mtb dnaJ1(H38Q) strep</i>                     | MGM6241 transformed with pAJF705                                                           |
| MGM6284             | $\Delta$ <i>dnaJ1 attB::Pmop-Ms dnaJ1(H38Q) strep</i>                      | MGM6241 transformed with pAJF738                                                           |
| MGM6285             | $\Delta$ <i>dnaJ2::loxP-hyg attB::Pmop-Ms dnaJ2(H32Q) strep</i>            | MGM6070 transformed with pAJF700                                                           |
| MGM6286             | $\Delta$ <i>dnaJ2::loxP-hyg attB::Pmop-Mtb dnaJ2(H32Q) strep</i>           | MGM6070 transformed with pAJF707                                                           |

**Table S2. Plasmids used in this study**

| <b>Plasmid name</b> | <b>Relevant features</b>                                        | <b>Construction</b>                                                                                           |
|---------------------|-----------------------------------------------------------------|---------------------------------------------------------------------------------------------------------------|
| pETHisSUMO          | pET His6 Sumo TEV LIC cloning vector carb                       | Addgene #29711                                                                                                |
| pHYRS52             | His6- <i>S. cerevisiae</i> ulp1 (res. 403-621) carb             | Addgene #31122 ( <b>ref (5)</b> )                                                                             |
| pET-47b(+)          | N-terminal His6 kan                                             | Novagen                                                                                                       |
| pEcTL02             | His6-SUMO-Mtb clpB                                              | overlap extension PCR with pETHisSUMO and megaprimer made using oClpBf and oClpBr                             |
| pEcTL03             | His6-SUMO-Mtb dnaJ1                                             | overlap extension PCR with pETHisSUMO and megaprimer made using oDnaJ1f and oDnaJ1r                           |
| pEcTL04             | His6-SUMO-Mtb dnaJ2                                             | overlap extension PCR with pETHisSUMO and megaprimer made using oDnaJ2f and oDnaJ2r                           |
| pEcTL05             | His6-SUMO-Mtb grpE                                              | overlap extension PCR with pETHisSUMO and megaprimer made using oGrpEf and oGrpEr                             |
| pEcTL06             | His6-SUMO-Mtb dnaK                                              | overlap extension PCR with pETHisSUMO and megaprimer made using oDnaKf and oDnaKr                             |
| pEcTL07             | His6-Mtb dnaK                                                   | mutagenesis of pEcTL06 using oMutDnaKf and oMutDnaKr                                                          |
| pEcTL08             | His6-Mtb-Hsp20                                                  | overlap extension PCR with pET47b and megaprimer made using oHspf and oHspr                                   |
| pEcTL09             | His6-SUMO-Mtb dnaK(T175S)                                       | mutagenesis of pEcTL06 using oMutT175Sf and oMutT175Sr                                                        |
| pEcTL10             | His6-SUMO-Mtb dnaJ1(H38Q)                                       | mutagenesis of pEcTL03 using oMutH38Qf and oMutH38Qr                                                          |
| pEcTL11             | His6-SUMO-Mtb dnaJ1(D40E)                                       | mutagenesis of pEcTL03 using oMutD40Ef and oMutD40Er                                                          |
| pEcTL12             | His6-SUMO-Mtb dnaJ2(H32Q)                                       | mutagenesis of pEcTL04 using oMutH32Qf and oMutH32Qr                                                          |
| pEcTL13             | His6-SUMO-Mtb dnaJ2(D34E)                                       | mutagenesis of pEcTL03 using oMutD34Ef and oMutD34Er                                                          |
| pDB19               | attP(L5)::zeo                                                   | Lab Stock                                                                                                     |
| pDB60               | attP(L5)::strep                                                 | Lab Stock                                                                                                     |
| pmsg419             | P <sub>Tb21</sub> -tetR(sB) P <sub>myc1-tetO</sub> -HA hyg oriM | Lab Stock                                                                                                     |
| pMV306kn            | attP(L5)::kan                                                   | Lab Stock                                                                                                     |
| pAJF067             | hyg, galK, sacB                                                 | <b>ref (2)</b>                                                                                                |
| pAJF256             | Ms dnaJ1 knockout front flank, sacB, galK, hyg                  | cut Msmeg_0711 front flank (oAF318/oAF319, MC2155 gDNA) with SpeI/NdeI and ligated to pAJF067 cut with same   |
| pAJF258             | Ms dnaJ1 knockout front flank and back flank, sacB, galK, hyg   | cut Msmeg_0711 back flank (oAF320/oAF321, MC2155 gDNA) with AvrII/NdeI and ligated to pAJF256 cut with same   |
| pAJF260             | attB:Pmop-Ms dnaJ1 kan                                          | cut Msmeg_0711 (oAF328/oAF329, MC2155 gDNA) with NdeI/ClaI and ligating to pAJF070                            |
| pAJF261             | attB:Pmop-Ms dnaJ2 kan                                          | cut Msmeg_4504 (oAF326/oAF327, MC2155 gDNA) with NdeI/ClaI and ligating to pAJF070                            |
| pAJF295             | attB:Pmop-Ms dnaJ1 strep                                        | cut Pmop-dnaJ1 from pAJF260 with XbaI/ClaI and ligated to pDB60 cut with same                                 |
| pAJF296             | attB:Pmop-Ms dnaJ2 strep                                        | cut Pmop-dnaJ2 from pAJF261 with XbaI/ClaI and ligated to pDB60 cut with same                                 |
| pAJF304             | pmsg360hyg plus Ms dnaJ2 front flank                            | cut dnaJ2 front flank (oAF389/oAF390, MC2155 gDNA) with BglII/HindIII and ligated to pmsg360hyg cut with same |

|         |                                               |                                                                                                                                             |
|---------|-----------------------------------------------|---------------------------------------------------------------------------------------------------------------------------------------------|
| pAJF306 | Ms dnaJ2 phage KO vector                      | cut dnaJ2 back flank (oAF391/oAF392, MC2155 gDNA) with XbaI/BamHI and ligating to pAJF304 cut with same                                     |
| pAJF329 | PTb21-tetR(sB), Pmyc1tetO-HA-dnaJ2, kan, oriM | cut dnaJ2 (oAF418/oAF419, MC2155 gDNA) with ClaI/AclI and ligated to pAJF326 cut with same                                                  |
| pAJF700 | attB:Pmop-Ms dnaJ2(H32Q) strep                | in-fusion reaction of pDB60 linearized with XbaI/ClaI and 5'dnaJ2H32Q (306knfwd/oAF1262, pAJF296) and 3'dnaJ2H32Q (oAF765/oAF1263, pAJF296) |
| pAJF705 | attB:Pmop-Mtb dnaJ1(H38Q) strep               | in-fusion reaction of 5'dnaJ1 (oAF1250/1254, Mtb gDNA), 3'dnaJ1 (oAF1255/1251, Mtb gDNA) and pAJF296 linearized with NdeI/ClaI              |
| pAJF706 | attB:Pmop-Mtb dnaJ1(D40E) strep               | in-fusion reaction of 5'dnaJ1 (oAF1250/1256, Mtb gDNA), 3'dnaJ1 (oAF1257/1251, Mtb gDNA) and pAJF296 linearized with NdeI/ClaI              |
| pAJF707 | attB:Pmop-Mtb dnaJ2(H32Q) strep               | in-fusion reaction of 5'dnaJ2 (oAF1252/1258, Mtb gDNA), 3'dnaJ2 (oAF1259/1253, Mtb gDNA) and pAJF296 linearized with NdeI/ClaI              |
| pAJF708 | attB:Pmop-Mtb dnaJ2(D34E) strep               | in-fusion reaction of 5'dnaJ2 (oAF1252/1260, Mtb gDNA), 3'dnaJ2 (oAF1261/1253, Mtb gDNA) and pAJF296 linearized with NdeI/ClaI              |
| pAJF710 | attB(L5):Pmop-Mtb dnaJ2 strep                 | in-fusion reaction of Mtb dnaJ2 (oAF1252/1253, Mtb gDNA) and pAJF296 linearized with NdeI/ClaI                                              |
| pAJF738 | attB:Pmop-Ms dnaJ1(H38Q) strep                | in-fusion reaction of 5'dnaJ1 (306knfwd/oAF1301, pAJF260), 3'dnaJ1 (oAF1302/765, pAJF685) and pDB60 linearized with XbaI/ClaI               |



**Table S3. Oligonucleotides used for this study**

| Oligo name | 5'-3' sequence                                              |
|------------|-------------------------------------------------------------|
| oClpBf     | GAGGCTCACAGAGAACAGATTGGTGGGGTGGACTCGTTTAACCCGAC             |
| oClpBr     | CTTTCGGGCTTTGTTAGCAGCCGGATCAGTCAGCCCAGGATCAGCGAGTC          |
| oDnaJ1f    | GAGGCTCACAGAGAACAGATTGGTGGGATGGCCCAAAGGGAATGGGTCT           |
| oDnaJ1r    | CTTTCGGGCTTTGTTAGCAGCCGGATCAGTCAGCGATTACCTGCCCATCCG         |
| oDnaJ2f    | GAGGCTCACAGAGAACAGATTGGTGGGGTGGCACGCGATTATTACGG             |
| oDnaJ2r    | CTTTCGGGCTTTGTTAGCAGCCGGATCAGTTAGCGCCCGGTGAAGGTCT           |
| oGrpEf     | GAGGCTCACAGAGAACAGATTGGTGGGGTGACGGACGGAAATCAAAAGC           |
| oGrpEr     | CTTTCGGGCTTTGTTAGCAGCCGGATCAGTTAACTGCCCGACGGTTCTG           |
| oDnaKf     | GAGGCTCACAGAGAACAGATTGGTGGGATGGCTCGTGCGGTCTGGGATCGACCTC     |
| oDnaKr     | CTTTCGGGCTTTGTTAGCAGCCGGATCAGTCACTTGGCCTCCCG                |
| oMutDnaKf  | ATGGTTCTTCTATGGCTAGCATGGCTCGTGCGGTCTGGGAT                   |
| oMutDnaKr  | ATCCCACCCGACGACGAGCCATGCTAGCCATAGAAGAACCAT                  |
| oHspf      | CGGCTCTTGAAGTCTCTTTTCAGGGACCCATGAACAATCTCGCATTTGTGGTCTCGCTC |
| oHspr      | TTCTTTACTACCGGTGGCACCAGAGCGAGCTACTTCGTGATGGCGATGCGCTGC      |
| oMutT175Sf | CGACTTGGGTGGTGGCAGTTTCGACGTTTCCCTG                          |
| oMutT175Sr | CAGGAAACGTCGAAACTGCCACCACCCAAGTCG                           |
| oMutH38Qf  | CGCGCGACCTGCAACCCGACGCGAACCCTGGGCAAC                        |
| oMutH38Qr  | GTTGCCCGGGTTCGCGTCCGGTTGCAGGTCGCGCG                         |
| oMutD40Ef  | CGCGCGACCTGCATCCGGAAGCGAACCCTGGGCAAC                        |
| oMutD40Er  | GTTGCCCGGGTTCGCTTCCGGATGCAGGTCGCGCG                         |
| oMutH32Qf  | CTGGCGCGGAGCTGCAACCCGACGTCACCCGGACGAG                       |
| oMutH32Qr  | CTCGTCCGGGTTGACGTCGGGTTGCAGCTCGCGCGCCAG                     |
| oMutD34Ef  | CTGGCGCGGAGCTGCATCCCGAAGTCAACCCTGGACGAG                     |
| oMutD34Er  | CTCGTCCGGGTTGACTTCGGGATGCAGCTCGCGCGCCAG                     |
| oAF318     | GTTACTAGTCCCGCAAGGGTCTGGCG2 1                               |
| oAF319     | GCACATATGGCTGCGCCACCTCCTTAC                                 |
| oAF320     | GTACATATGTGAGCGGCAAACGCAAC2 1                               |
| oAF321     | GTTCTTAGGAGCGGCGTGACCGCGTC                                  |
| oAF326     | GTTTCATATGACCCGGCACAGAAAGG                                  |
| oAF327     | GACATCGATTTCAGCGACCGGTGAAC                                  |
| oAF328     | GTCCATATGTAGAAAGAAGAGGTAAG                                  |
| oAF329     | GACATCGATTTCATACATTTCCCGCCCATC                              |
| oAF389     | GTTAGATCTTCGGCGACGCGATCGACG                                 |
| oAF389     | GTTAGATCTTCGGCGACGCGATCGACG                                 |
| oAF390     | GTTAAGCTTGCTGTCTTGCCGTGACC                                  |
| oAF390     | GTTAAGCTTGCTGTCTTGCCGTGACC                                  |
| oAF391     | GAATCTAGATGACGGACGTGGGCG                                    |
| oAF392     | GAAGGATCCGACAGGTATTTTCGGCG                                  |
| oAF418     | GTTATCGATTTCGGCACGTGATTACTAC                                |

|         |                                |
|---------|--------------------------------|
| oAF419  | GTTAACGTTTCAGCGACCGGTGAACG     |
| oAF1254 | GTCCGGTTGCAGGTCGCGCGCCAAC      |
| oAF1255 | GACCTGCAACCGGACGCGAACCCGG      |
| oAF1256 | GGTTCGCTTCCGGATGCAGGTCGCG      |
| oAF1257 | CATCCGGAAGCGAACCCGGGCAACC      |
| oAF1258 | CGTCGGGTTGCAGCTCGCGCGCCAG      |
| oAF1259 | GAGCTGCAACCCGACGTCAACCCGG      |
| oAF1260 | GTTGACTTCGGGATGCAGCTCGC        |
| oAF1261 | GCATCCCGAAGTCAACCCGGACGAGG     |
| oAF1262 | CGTCGGGTTGCAGCTCACGTGCC        |
| oAF1263 | GAGCTGCAACCCGACGTCAACCCGAC     |
| oAF1301 | GTTCGGTTCAGGCTGCAGCTCGGCGGCCAG |
| oAF1302 | GAGCTGCAGCCTGACCGGAACCTCCGATC  |

## References

1. Zolkiewski M, Kessel M, Ginsburg A, & Maurizi MR (1999) Nucleotide-dependent oligomerization of ClpB from *Escherichia coli*. *Protein Sci* 8(9):1899-1903.
2. Fay A & Glickman MS (2014) An essential nonredundant role for mycobacterial DnaK in native protein folding. *PLoS Genet* 10(7):e1004516.
3. Rath A, Glibowicka M, Nadeau VG, Chen G, & Deber CM (2009) Detergent binding explains anomalous SDS-PAGE migration of membrane proteins. *Proc Natl Acad Sci U S A* 106(6):1760-1765.
4. Snapper SB, Melton RE, Mustafa S, Kieser T, & Jacobs WR (1990) Isolation and characterization of efficient plasmid transformation mutants of *Mycobacterium smegmatis*. *Mol Microbiol* 4(11):1911-1919.
5. Muona M, Aranko AS, & Iwai H (2008) Segmental isotopic labelling of a multidomain protein by protein ligation by protein trans-splicing. *Chembiochem* 9(18):2958-2961.
